# Supplementary material for: Sequestering carbon in the subsoil benefits crop transpiration at the onset of drought
Source: Copernicus journal article supplement (doi:10.5194/egusphere-2023-1077), 2023-06-19
Supplement: Supplementary file 1 [file egusphere-2023-1077-supplement.pdf]

# Supplementary Material to “Sequestering carbon in the subsoil benefits crop transpiration at the onset of drought”

## S1. Climate projections

Table S 1 - Names of climate projection’s models selected from CH2018 (<https://www.nccs.admin.ch/nccs/de/home/materialien-und-daten/daten/ch2018---klimaszenarien-fuer-die-schweiz.html>). Only sets that included all climatic variables required for SWAP (temperature, precipitation, wind speed, solar radiation and vapour pressure).

| Selected model chains      | RCP   |
|----------------------------|-------|
| CLMCOM-CCLM5_ECEARTH_EUR44 | RCP85 |
| CLMCOM-CCLM4_HADGEM_EUR44  |       |
| CLMCOM-CCLM5_MIROC_EUR44   |       |
| CLMCOM-CCLM5_MPIESM_EUR44  |       |
| CLMCOM-CCLM5_HADGEM_EUR44  |       |
| DMI-HIRHAM_ECEARTH_EUR11   |       |
| DMI-HIRHAM_ECEARTH_EUR44   |       |
| KNMI-RACMO_ECEARTH_EUR44   |       |
| KNMI-RACMO_HADGEM_EUR44    |       |
| SMHI-RCA_ECEARTH_EUR11     |       |
| SMHI-RCA_ECEARTH_EUR44     |       |
| SMHI-RCA_IPSL_EUR11        |       |
| SMHI-RCA_IPSL_EUR44        |       |
| SMHI-RCA_HADGEM_EUR11      |       |
| SMHI-RCA_HADGEM_EUR44      |       |
| SMHI-RCA_MPIESM_EUR11      |       |
| SMHI-RCA_MPIESM_EUR44      |       |
| SMHI-RCA_CCCMA_EUR44       |       |
| SMHI-RCA_CSIRO_EUR44       |       |
| SMHI-RCA_MIROC_EUR44       |       |
| SMHI-RCA_NORESM_EUR44      |       |
| SMHI-RCA_GFDL_EUR44        |       |

---

KNMI-RACMO\_ECEARTH\_EUR44

RCP45

KNMI-RACMO\_HADGEM\_EUR44

DMI-HIRHAM\_ECEARTH\_EUR11

DMI-HIRHAM\_ECEARTH\_EUR44

SMHI-RCA\_ECEARTH\_EUR11

SMHI-RCA\_ECEARTH\_EUR44

SMHI-RCA\_IPSL\_EUR11

SMHI-RCA\_IPSL\_EUR44

SMHI-RCA\_HADGEM\_EUR11

SMHI-RCA\_HADGEM\_EUR44

SMHI-RCA\_MPIESM\_EUR11

SMHI-RCA\_MPIESM\_EUR44

SMHI-RCA\_CCCMA\_EUR44

SMHI-RCA\_CSIRO\_EUR44

SMHI-RCA\_MIROC\_EUR44

SMHI-RCA\_NORESM\_EUR44

SMHI-RCA\_GFDL\_EUR44

---

DMI-HIRHAM\_ECEARTH\_EUR11

RCP26

KNMI-RACMO\_HADGEM\_EUR44

SMHI-RCA\_ECEARTH\_EUR11

SMHI-RCA\_ECEARTH\_EUR44

SMHI-RCA\_HADGEM\_EUR44

SMHI-RCA\_MPIESM\_EUR44

SMHI-RCA\_MIROC\_EUR44

SMHI-RCA\_NORESM\_EUR44

---

## S2. Summary of climatic variables at winter and summer for RCP2.6 and RCP4.5

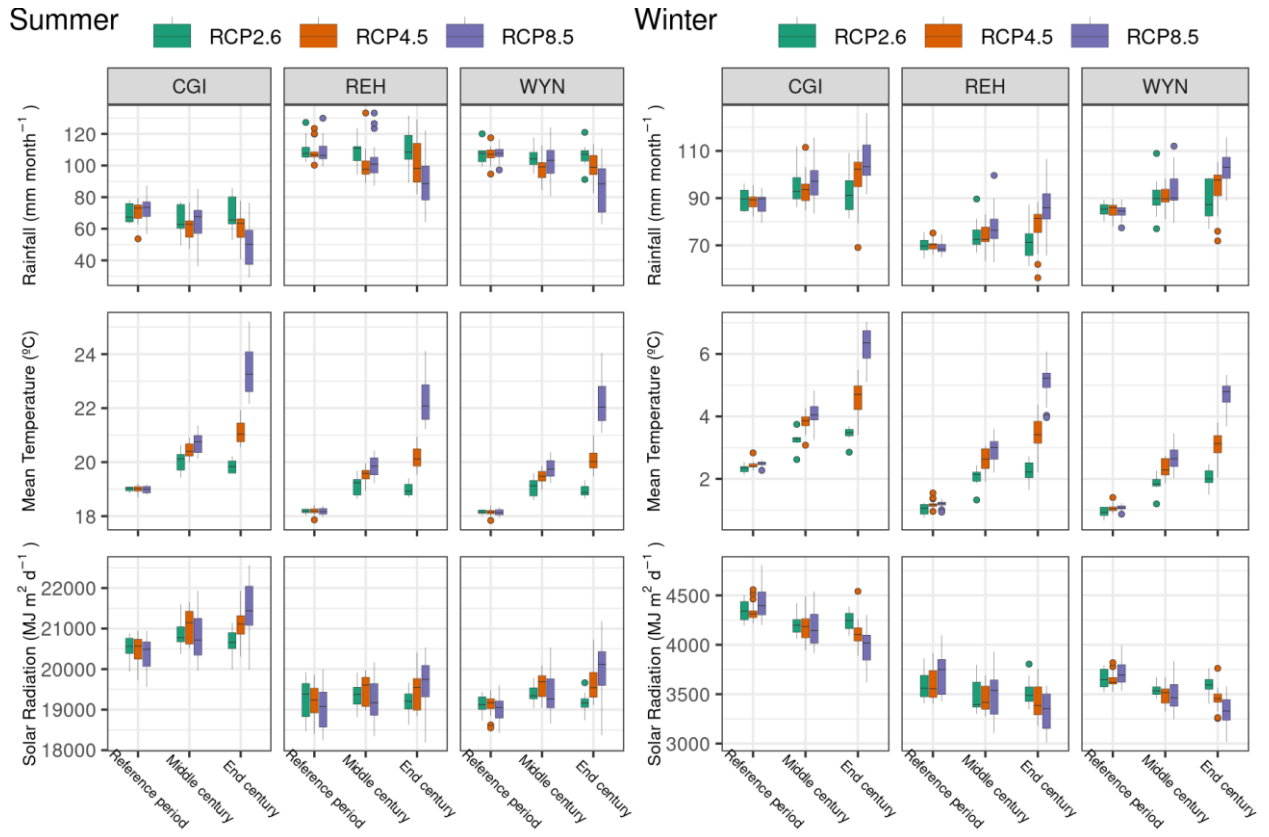

Figure S 1 - Summary of climatic variables considering monthly mean values at the stations Changins (CGI), Reckenholz (REH), and Wynau (WYN) for the projections RCP2.6, RCP4.5, and RCP8.5. Summer was considered as the months June, July and August, winter corresponds to December, January and February. Reference period: 1981-2020, mid-century: 2031-2060, end-of-century: 2071-2099. Rainfall corresponds to monthly sums, mean temperature is the mean between maximum and minimum temperature per day, averaged by month, solar radiation corresponds to daily values averaged by month.

### S3. SWAP Masterfile parametrization

```
*****
Filename: Swap.swp
* Contents: Main input data
*****
*   The main input file .swp contains the following sections:
*
*       - General section
*
*       - Meteorology section
*
*       - Crop section
*
*       - Soil water section
*
*       - Lateral drainage section
*
*       - Bottom boundary section
*
*       - Heat flow section
*
*       - Solute transport section
*** GENERAL SECTION ***
*****
* Part 1: Environment
PROJECT   = 'reh_lysimeter' ! Project description [A80]
PATHWORK  = ' '           ! Path to work folder [A80]
PATHATM   = '..\..\..\..\Data\projections\clim_CGI\CLMCOM-
CCLM4_HADGEM_EUR44_RCP85\'
PATHCROP  = ' '           ! Path to folder with crop files [A80]
PATHDRAIN = ' '           ! Path to folder with drainage files [A80]
SWSCRE    = 0             ! Switch, display progression of simulation run to
screen:
                                ! 0 = no display to screen
                                ! 1 = display water balance components
                                ! 2 = display daynumber
SWERROR   = 1             ! Switch for printing errors to screen [Y=1,
N=0]
*****
* Part 2: Simulation period
TSTART    =01-jan-2081
TEND      =31-dec-2099
```

```

*****
* Part 3: Output dates
* Number of output times during a day
  NPRINTDAY = 1      ! Number of output times during a day [1..1000, I]

* If NPRINTDAY = 1, specify dates for output of state variables and fluxes
  SWMONTH = 0       ! Switch, output each month [Y=1, N=0]

* If SWMONTH = 0, choose output interval and/or specific dates
  PERIOD = 1        ! Fixed output interval, ignore = 0, [0..366, I]
  SWRES = 0         ! Switch, reset output interval counter each year [Y=1,
N=0]
  SWODAT = 0        ! Switch, extra output dates are given in table below
[Y=1, N=0]

* If SWODAT = 1, list specific dates [dd-mmm-yyyy], maximum MAOUT dates:
  OUTDATINT =
  31-Jan-2002
  31-Dec-2004
* End of table

* Output times for overall water and solute balances in *.BAL and *.BLC
file: choose output
* at a fixed date each year or at different dates:
  SWYRVAR = 0       ! 0 = each year output at the same date
                  ! 1 = output at different dates

* If SWYRVAR = 0 specify fixed date:
  DATEFIX = 31 12   ! Specify day and month for output of yearly balances
[dd mm]

* If SWYRVAR = 1 specify all output dates [dd-mmm-yyyy], maximum MAOUT
dates:
  OUTDAT =
  31-dec-2003
  31-dec-2004
* End of table

```

\*\*\*\*\*

\* Part 4: Output files

\* General information

OUTFIL = 'Result' ! Generic file name of output files [A16]

SWHEADER = 0 ! Print header at the start of each balance period  
[Y=1, N=0]

\* Optional files

SWVAP = 0 ! Switch, output soil profiles of moisture, solute and  
temperature [Y=1, N=0]

SWBLC = 0 ! Switch, output file with detailed yearly water  
balance [Y=1, N=0]

SWATE = 0 ! Switch, output file with soil temperature profiles  
[Y=1, N=0]

SWBMA = 0 ! Switch, output file with water fluxes, only for  
macropore flow [Y=1, N=0]

SWDRF = 0 ! Switch, output of drainage fluxes, only for extended  
drainage [Y=1, N=0]

SWSWB = 0 ! Switch, output surface water reservoir, only for  
extended drainage [Y=1, N=0]

\* Optional detailed output files on hydrology, e.g. for water quality  
models as PEARL and ANIMO

SWAFO = 0 ! Switch, output file with formatted hydrological data  
! 0 = no output  
! 1 = output to a file named \*.AFO  
! 2 = output to a file named \*.BFO

SWAUN = 0 ! Switch, output file with unformatted hydrological  
data  
! 0 = no output  
! 1 = output to a file named \*.AUN  
! 2 = output to a file named \*.BUN

\* Maximum deviation in water balance; in case of larger deviation, an error  
file is created (\*.DWB.CSV)

CRITDEVMASBAL = 0.00001 ! Critical Deviation in water balance during  
PERIOD [0.0..1.0 cm, R]

\* If SWAFO = 1 or 2, or SWAUN = 1 or 2: fine vertical discretization can be lumped to more coarse discretization

SWDISCRVERT = 0 ! SWDISCRVERT = 0: no conversion  
! SWDISCRVERT = 1: convert vertical discretization,

\* If SWDISCRVERT = 1 then specify:

NUMNODNEW = 6 ! New number of nodes [1..macp, I, -]

\* List thickness of each compartment, total thickness should correspond to Soil Water Section, part 4

DZNEW = 10.0 10.0 10.0 20.0 30.0 50.0 ! thickness of compartments  
[1.0d-6...5.0d2, cm, R]

\*\*\*\*\*

\*\*\* METEOROLOGY SECTION \*\*\*

\*\*\*\*\*

\* General data

\* File name

METFIL = 'CGI\_clim'

! Extension is equal to last 3 digits of year, e.g.  
003 denotes year 2003

\* Type of weather data for potential evapotranspiration

SWETR = 0 ! 0 = Use basic weather data and apply Penman-Monteith equation

! 1 = Use reference evapotranspiration data in combination with crop factors

\* If SWETR = 0, specify:

LAT = 46.400

ALT = 455.00

ALTW = 2.00

ANGSTROMA = 0.25

ANGSTROMB = 0.50

SWDIVIDE = 1 ! 0 = Distribution E and T based on crop and soil factors

! 1 = Distribution E and T based on direct application of Penman-Monteith

\* Time interval of evapotranspiration and rainfall weather data

```

SWMETDETAIL = 0      ! 0 = time interval is equal to one day
                    ! 1 = time interval is less than one day

* In case of detailed meteorological weather records (SWMETDETAIL = 1),
specify:

  NMETDETAIL = 10    ! Number of weather data records each day [1..96 -,
I]

* In case of daily meteorological weather records (SWMETDETAIL = 0):

  SWETSINE = 0      ! Switch, distribute daily Tp and Ep according to
sinus wave [Y=1, N=0]

  SWRAIN = 0        ! Switch for use of actual rainfall intensity (only
if SWMETDETAIL = 0):

                    ! 0 = Use daily rainfall amounts
                    ! 1 = Use daily rainfall amounts + mean intensity
                    ! 2 = Use daily rainfall amounts + duration
                    ! 3 = Use detailed rainfall records (dt < 1 day),
as supplied in separate file

* If SWRAIN = 1, specify mean rainfall intensity RAINFLUX [0.d0..1000.d0
mm/d, R]

* as function of Julian time TIME [0..366 d, R], maximum 30 records

  TIME      RAINFLUX
  1.0       20.0
  360.0     20.0

* End of table

* If SWRAIN = 3, specify file name of file with detailed rainfall data

  RAINFIL = 'WagRain' ! File name of detailed rainfall data without
extension .YYY, [A200]

                    ! Extension is equal to last 3 digits of year, e.g.
003 denotes year 2003

*****
*** CROP SECTION ***
*****

* Part 1: Crop rotation scheme

```



\* Switch for bare soil or cultivated soil

SWCROP = 1 ! 0 = Bare soil

! 1 = Cultivated soil

\* Specify for each crop (maximum MACROP):

\* INITCRP = type of initialisation of crop growth: emergence (default) = 1, sowing = 2 [-]

\* CROPSTART = date of crop emergence [dd-mmm-yyyy]

\* CROPEND = date of crop harvest [dd-mmm-yyyy]

\* CROPNAME = crop name [A40]

\* CROPFIL = name of file with crop input parameters without extension .CRP, [A40]

\* CROPTYPE = growth module: 1 = simple; 2 = detailed, WOFOST general; 3 = detailed, WOFOST grass

| INITCRP | CROPSTART  | CROPEND    | CROPNAME | CROPFIL  | CROPTYPE |
|---------|------------|------------|----------|----------|----------|
| 2       | 6-may-2081 | 8-nov-2081 | 'maize'  | 'MaizeS' | 1        |
| 2       | 6-may-2082 | 8-nov-2082 | 'maize'  | 'MaizeS' | 1        |
| 2       | 6-may-2083 | 8-nov-2083 | 'maize'  | 'MaizeS' | 1        |
| 2       | 5-may-2084 | 7-nov-2084 | 'maize'  | 'MaizeS' | 1        |
| 2       | 6-may-2085 | 8-nov-2085 | 'maize'  | 'MaizeS' | 1        |
| 2       | 6-may-2086 | 8-nov-2086 | 'maize'  | 'MaizeS' | 1        |
| 2       | 6-may-2087 | 8-nov-2087 | 'maize'  | 'MaizeS' | 1        |
| 2       | 5-may-2088 | 7-nov-2088 | 'maize'  | 'MaizeS' | 1        |
| 2       | 6-may-2089 | 8-nov-2089 | 'maize'  | 'MaizeS' | 1        |
| 2       | 6-may-2090 | 8-nov-2090 | 'maize'  | 'MaizeS' | 1        |
| 2       | 6-may-2091 | 8-nov-2091 | 'maize'  | 'MaizeS' | 1        |
| 2       | 5-may-2092 | 7-nov-2092 | 'maize'  | 'MaizeS' | 1        |
| 2       | 6-may-2093 | 8-nov-2093 | 'maize'  | 'MaizeS' | 1        |
| 2       | 6-may-2094 | 8-nov-2094 | 'maize'  | 'MaizeS' | 1        |
| 2       | 6-may-2095 | 8-nov-2095 | 'maize'  | 'MaizeS' | 1        |
| 2       | 5-may-2096 | 7-nov-2096 | 'maize'  | 'MaizeS' | 1        |
| 2       | 6-may-2097 | 8-nov-2097 | 'maize'  | 'MaizeS' | 1        |
| 2       | 6-may-2098 | 8-nov-2098 | 'maize'  | 'MaizeS' | 1        |
| 2       | 6-may-2099 | 8-nov-2099 | 'maize'  | 'MaizeS' | 1        |

\* End of table

\*\*\*\*\*

```

*****
* Part 2: Fixed irrigation applications

* Switch for fixed irrigation applications
  SWIRFIX = 0    ! 0 = no irrigation applications are prescribed
              ! 1 = irrigation applications are prescribed

* If SWIRFIX = 1, specify:

* Switch for separate file with irrigation data
  SWIRGFIL = 0  ! 0 = irrigation data are specified below
              ! 1 = irrigation data are specified in a separate file

* If SWIRGFIL = 0 specify the following information of each fixed
irrigation event (max. MAIRG):
* IRDATE   = date of irrigation [dd-mmm-yyyy]
* IRDEPTH  = amount of water [0..1000 mm, R]
* IRCONC   = concentration of irrigation water [0..1000 mg/cm3, R]
* IRTYPE   = type of irrigation: sprinkling = 0, surface = 1

      IRDATE   IRDEPTH   IRCONC   IRTYPE
05-jan-2002    5.0      1000.0     1
* end of table

* If SWIRGFIL = 1, specify name of file with irrigation data:
  IRGFIL = 'testirri'    ! File name without extension .IRG [A32]d(temp)
*****
*** SOIL WATER SECTION ***
*****
* Part 1: Initial soil moisture condition

  SWINCO = 1 ! Switch, type of initial soil moisture condition:
              ! 1 = pressure head as function of soil depth
              ! 2 = pressure head of each compartment is in hydrostatic
equilibrium
              !      with initial groundwater level

```

! 3 = read final pressure heads from output file of previous  
Swap simulation

\* If SWINCO = 1, specify soil depth ZI [-1.d5..0 cm, R] and initial  
\* soil water pressure head H [-1.d10..1.d4 cm, R] (maximum MACP):

| ZI     | H      |
|--------|--------|
| -0.5   | -100.0 |
| -120.0 | -100.0 |

\* End of table

\* If SWINCO = 2, specify initial groundwater level:

GWLI = -200.0 ! Initial groundwater level [-10000..1000 cm, R]

\* If SWINCO = 3, specify output file with initial values for current run:

INIFIL = 'result.end' ! name of output file \*.END which contains  
initial values [A200]

\*\*\*\*\*  
\*\*\*\*\*

\* Part 2: Ponding, runoff and runoff

\* Ponding

\* Switch for variation ponding threshold for runoff

SWPOND MX = 0 ! 0 = Ponding threshold for runoff is constant  
! 1 = Ponding threshold for runoff varies in time

\* If SWPOND MX = 0, specify

POND MX = 0.2 ! In case of ponding, minimum thickness for runoff  
[0..1000 cm, R]

\* If SWPOND MX = 1, specify minimum thickness for runoff POND MX TB [0..1000  
cm, R] as function of time

| DATE PMX    | POND MX TB | ! (max. MAIRG records) |
|-------------|------------|------------------------|
| 01-jan-2002 | 0.2        |                        |
| 31-dec-2004 | 0.2        |                        |

\* End of table

```

* Runoff
  RSRO      = 0.5 ! Drainage resistance for surface runoff [0.001..1.0 d, R]
  RSROEXP   = 1.0 ! Exponent in drainage equation of surface runoff
[0.01..10.0 -, R]

* Runon: specify whether runon data are provided in extra input file
  SWRUNON   = 0 ! 0 = No input of runon data
              ! 1 = Runon data are provided in extra input file

* If SWRUNON = 1, specify name of file with runon input data
* This file may be an output file *.inc (with only 1 header line) of a
previous Swap-simulation
  RUFIL     = 'runon.inc' ! File name with extension [A80]
*****

* Part 3: Soil evaporation

  CFEVAPPOND = 1.25 ! When ETref is used, evaporation coefficient in case
of ponding [0..3 -, R]

  SWCFBS    = 0 ! Switch for use of soil factor CFBS to calculate Epot from
ETref
              ! 0 = soil factor is not used
              ! 1 = soil factor is used

* If SWCFBS = 1, specify soil factor CFBS:
  CFBS      = 0.5 ! Soil factor CFBC in Epot = CFBS * ETref [0..1.5 -, R]

* If SWDIVIDE = 1 (partitoning according to PMdirect) specify minimum soil
resistance
  RSOIL     = 30.0 ! Soil resistance of wet soil [0..1000.0 s/m, R]

  SWREDU    = 1 ! Switch, method for reduction of potential soil
evaporation:
              ! 0 = reduction to maximum Darcy flux
              ! 1 = reduction to maximum Darcy flux and to maximum Black
(1969)
              ! 2 = reduction to maximum Darcy flux and to maximum
Boesten/Stroosnijder (1986)

```

COFRED = 0.35 ! Soil evaporation coefficient of Black [0..1 cm/d<sup>1/2</sup>, R],  
! or Boesten/Stroosnijder [0..1 cm<sup>1/2</sup>, R]

RSIGNI = 0.5 ! Minimum rainfall to reset method of Black [0..1 cm/d, R]

\*\*\*\*\*

\* Part 4: Vertical discretization of soil profile

\* Specify the following data (maximum MACP lines):

\* ISUBLAY = number of sub layer, start with 1 at soil surface [1..MACP, I]

\* ISOILLAY = number of soil physical layer, start with 1 at soil surface  
[1..MAHO, I]

\* HSUBLAY = height of sub layer [0..1.d4 cm, R]

\* HCOMP = height of compartments in the sub layer [0.0..1000.0 cm, R]

\* NCOMP = number of compartments in the sub layer (Mind NCOMP =  
HSUBLAY/HCOMP) [1..MACP, I]

| ISUBLAY | ISOILLAY | HSUBLAY | HCOMP  | NCOMP |
|---------|----------|---------|--------|-------|
| 1       | 1        | 5.0000  | 0.5000 | 10    |
| 2       | 1        | 22.0000 | 1.0000 | 22    |
| 3       | 2        | 33.0000 | 1.0000 | 33    |
| 4       | 3        | 25.0000 | 5.0000 | 5     |
| 5       | 4        | 25.0000 | 5.0000 | 5     |
| 6       | 5        | 25.0000 | 5.0000 | 5     |

\* end of table

\*\*\*\*\*

\* Part 5: Soil hydraulic functions

\* Switch for analytical functions or tabular input:

SWSOPHY = 0 ! 0 = Analytical functions with input of Mualem - van  
Genuchten parameters

! 1 = Soil physical tables

\* If SWSOPHY = 0, specify MvG parameters for each soil physical layer  
(maximum MAHO):

\* ISOILLAY1 = number of soil physical layer, as defined in part 4 [1..MAHO, I]

\* ORES = Residual water content [0..1 cm<sup>3</sup>/cm<sup>3</sup>, R]

\* OSAT = Saturated water content [0..1 cm<sup>3</sup>/cm<sup>3</sup>, R]

\* ALFA = Parameter alfa of main drying curve [0.0001..100 /cm, R]

\* NPAR = Parameter n [1.001..9 -, R]

\* KSATFIT = Fitting parameter Ksat of hydraulic conductivity function [1.d-5..1d5 cm/d, R]

\* LEXP = Exponent in hydraulic conductivity function [-25..25 -, R]

\* ALFAW = Alfa parameter of main wetting curve in case of hysteresis [0.0001..100 /cm, R]

\* H\_ENPR = Air entry pressure head [-40.0..0.0 cm, R]

\* KSATEXM = Measured hydraulic conductivity at saturated conditions [1.d-5..1d5 cm/d, R]

\* BDENS = Dry soil bulk density [100..1d4 mg/cm<sup>3</sup>, R]

| ISOILLAY1 | ORES   | OSAT   | ALFA   | NPAR   | KSATFIT | LEXP    | ALFAW  | H_ENPR | KSATEXM | BDENS   |
|-----------|--------|--------|--------|--------|---------|---------|--------|--------|---------|---------|
| 1         | 0.0427 | 0.4422 | 0.1283 | 1.1556 | 57.76   | -3.0951 | 0.1283 | 0.0    | 57.76   | 1500.00 |
| 2         | 0.0409 | 0.3774 | 0.0521 | 1.1659 | 19.24   | -2.9550 | 0.0521 | 0.0    | 19.24   | 1530.00 |
| 3         | 0.0732 | 0.3872 | 0.0849 | 1.2123 | 26.69   | -3.7196 | 0.0849 | 0.0    | 26.69   | 1470.00 |
| 4         | 0.0748 | 0.3820 | 0.0214 | 1.3604 | 10.17   | -1.1543 | 0.0214 | 0.0    | 10.17   | 1470.00 |
| 5         | 0.0722 | 0.3905 | 0.0116 | 1.2607 | 5.02    | -0.9575 | 0.0116 | 0.0    | 5.02    | 1470.00 |

\* --- end of table

\* If SWSOPHY = 1, specify names of input files [A80] with soil hydraulic tables for each soil layer:

FILENAME\_SOPHY = 'topsoil\_sand\_B2.csv', 'subsoil\_sand\_O2.csv'

\*\*\*\*\*

\* Part 6: Hysteresis of soil water retention function

\* Switch for hysteresis:

SWHYST = 0 ! 0 = no hysteresis  
! 1 = hysteresis, initial condition wetting  
! 2 = hysteresis, initial condition drying

\* If SWHYST = 1 or 2, specify:

TAU = 0.2 ! Minimum pressure head difference to change from wetting to drying and vice versa, [0..1 cm, R]

\*\*\*\*\*

\* Part 7: Maximum rooting depth

RDS = 135.0 ! Maximum rooting depth allowed by the soil profile  
[1..5000 cm, R]

\*\*\*\*\*

\* Part 8: Preferential flow due to macropores

SWMACRO = 0 ! Switch for macropore flow [0..2, I]:  
! 0 = no macropore flow  
! 1 = macropore flow

\*\*\*\*\*

\* Part 9: Snow and frost

\* Snow

SWSNOW = 1 ! Switch, calculate snow accumulation and melt [Y=1,  
N=0]

\* If SWSNOW = 1, specify:

SNOWINCO = 22.0 ! Initial snow water equivalent [0..1000 cm, R]  
TEPRRAIN = 2.0 ! Temperature above which all precipitation is rain  
[ 0..10 °C, R]  
TEPRSNOW = -2.0 ! Temperature below which all precipitation is snow  
[-10..0 °C, R]  
SNOWCOEF = 0.3 ! Snowmelt calibration factor [0.0...10.0 -, R]

\* Frost

SWFROST = 1 ! Switch, in case of frost reduce soil water flow [Y=1, N=0]

\* If SWFROST = 1, specify soil temperature range in which soil water flow  
is reduced

TFROSTSTA = 0.0 ! Soil temperature (°C) at which reduction of water  
fluxes starts [-10..5 °C, R]  
TFROSTEND = -1.0 ! Soil temperature (°C) at which reduction of water  
fluxes ends [-10..5 °C, R]

\*\*\*\*\*

\* Part 10 Numerical solution of Richards' equation for soil water flow

```

DTMIN          = 1.0d-6      ! Minimum timestep [1.d-7..0.1 d, R]
DTMAX          = 0.2        ! Maximum timestep [dtmin..1 d, R]
GWLCONV        = 100.0      ! Maximum difference of groundwater level
between time steps [1.d-5..1000 cm, R]
CRITDEVH1CP    = 1.0d-2     ! Maximum relative difference in pressure
heads per compartment [1.0d-10..1.d3 -, R]
CRITDEVH2CP    = 1.0d-1     ! Maximum absolute difference in pressure
heads per compartment [1.0d-10..1.d3 cm, R]
CRITDEVPONDDT = 1.0d-4     ! Maximum water balance error of ponding layer
[1.0d-6..0.1 cm, R]
MAXIT          = 30        ! Maximum number of iteration cycles [5..100 -,
I]
MAXBACKTR      = 3         ! Maximum number of back track cycles within
an iteration cycle [1..10 -,I]

```

\* Switch for averaging method of hydraulic conductivity [1..4 -, I]:

```

SWKMEAN = 1    ! 1 = unweighted arithmic mean
          ! 2 = weighted arithmic mean
          ! 3 = unweighted geometric mean
          ! 4 = weighted geometric mean

```

\* Switch for updating hydraulic conductivity during iteration [0..1 -, I]:

```

SWKIMPL = 0    ! 0 = no update
          ! 1 = update

```

\*\*\*\*\*

\*\*\* LATERAL DRAINAGE SECTION \*\*\*

\*\*\*\*\*

\* Specify whether lateral drainage to surface water should be included

```

SWDRA = 0    ! Switch, simulation of lateral drainage:
          ! 0 = No simulation of drainage
          ! 1 = Simulation with basic drainage routine
          ! 2 = Simulation of drainage with surface water management

```

\* If SWDRA = 1 or SWDRA = 2 specify name of file with drainage input data:

```

DRFIL = 'Hupsel' ! File name with drainage input data without extension
.DRA [A16]

```



```

*****
*** BOTTOM BOUNDARY SECTION ***
*****

* Bottom boundary condition

      SWBBCFILE = 0      ! Switch for file with bottom boundary data:
                          ! 0 = data are specified in current file
                          ! 1 = data are specified in a separate file

* If SWBBCFILE = 1 specify name of file with bottom boundary data:
      BBCFIL = ' '      ! File name without extension .BBC [A32]

* If SWBBCFILE = 0, select one of the following options [1..8 -,I]:
      SWBOTB = 7      ! 1 Prescribe groundwater level
                          ! 2 Prescribe bottom flux
aquifer              ! 3 Calculate bottom flux from hydraulic head of deep
                          ! 4 Calculate bottom flux as function of groundwater level
                          ! 5 Prescribe soil water pressure head of bottom compartment
                          ! 6 Bottom flux equals zero
                          ! 7 Free drainage of soil profile
                          ! 8 Free outflow at soil-air interface

* Options 1-5 require additional bottom boundary data below
*****
* SWBOTB = 1 Prescribe groundwater level

* specify date [dd-mmm-yyyy] and groundwater level GWLEVEL [cm, -
10000..1000, R]

      DATE1      GWLEVEL      ! (max. MABBC records)
      01-jan-2002      -95.0
      31-dec-2004      -95.0

* End of table
*****
* SWBOTB = 2 Prescribe bottom flux

```

\* Specify whether a sinus function or a table are used for the bottom flux [1..2,-,I]:

SW2 = 2 ! 1 = sinus function  
! 2 = table

\* In case of sinus function (SW2 = 1), specify:

SINAVE = 0.1 ! Average value of bottom flux [-10..10 cm/d, R, + = upwards]

SINAMP = 0.05 ! Amplitude of bottom flux sine function [-10..10 cm/d, R]

SINMAX = 91.0 ! Time of the year with maximum bottom flux [0..366 d, R]

\* In case of table (SW2 = 2), specify date [dd-mmm-yyyy] and bottom flux QBOT2 [-100..100 cm/d, R, positive = upwards]:

| DATE2       | QBOT2 | ! (maximum MABBC records) |
|-------------|-------|---------------------------|
| 01-jan-2002 | 0.1   |                           |
| 30-jun-2002 | 0.2   |                           |
| 23-dec-2002 | 0.15  |                           |

\* End of table

\*\*\*\*\*

\* SWBOTB = 3 Calculate bottom flux from hydraulic head in deep aquifer

\* Switch for vertical hydraulic resistance between bottom boundary and groundwater level

SWBOTB3RESVERT = 0 ! 0 = Include vertical hydraulic resistance  
! 1 = Suppress vertical hydraulic resistance

\* Switch for numerical solution of bottom flux: 0 = explicit, 1 = implicit

SWBOTB3IMPL = 0 ! 0 = explicit solution (choose always when SHAPE < 1.0)  
! 1 = implicit solution

\* Specify:

SHAPE = 0.79 ! Shape factor to derive average groundwater level [0..1 -, R]

HDRAIN = -110.0 ! Mean drain base to correct for average groundwater level [-1d4..0 cm, R]

RIMLAY = 500.0 ! Vertical resistance of aquitard [0..1d5 d, R]

\* Specify whether a sinus function or a table are used for the hydraulic head in the deep aquifer [1..2 -,I]:

SW3 = 1 ! 1 = sinus function  
! 2 = table

\* In case of a sinus function (SW3 = 1), specify:

AQAVE = -140.0 ! Average hydraulic head in underlying aquifer [-1d4..1000 cm, R]

AQAMP = 20.0 ! Amplitude hydraulic head sinus wave [0..1000 cm, R]

AQTMAX = 120.0 ! First time of the year with maximum hydraulic head [0..366 d, R]

AQPER = 365.0 ! Period hydraulic head sinus wave [0..366 d, R]

\* In case of table (SW3 = 2), specify date [dd-mmm-yyyy] and average hydraulic head

\* HAQUIF in underlying aquifer [-1d4..1000 cm, R]:

| DATE3       | HAQUIF | ! (maximum MABBC records) |
|-------------|--------|---------------------------|
| 01-jan-2002 | -95.0  |                           |
| 30-jun-2002 | -110.0 |                           |
| 23-dec-2002 | -70.0  |                           |

\* End of table

\* An extra groundwater flux can be specified which is added to above specified flux [0..1 -,I]

SW4 = 1 ! 0 = no extra flux  
! 1 = include extra flux

\* If SW4 = 1, specify date [dd-mmm-yyyy] and bottom flux QBOT4 [-100..100 cm/d, R, positive = upwards]:

| DATE4       | QBOT4 | ! (maximum MABBC records) |
|-------------|-------|---------------------------|
| 01-jan-2002 | 1.0   |                           |
| 30-jun-2002 | -0.15 |                           |

23-dec-2002 1.2

\* End of table

\*\*\*\*\*

\* SWBOTB = 4 Calculate bottom flux as function of groundwater level

\* Specify whether an exponential relation or a table is used [1..2 -,I]:

SWQHBOT = 2 ! 1 = bottom flux is calculated with an exponential relation

! 2 = bottom flux is derived from a table

\* If SWQHBOT = 1, specify coefficients for  $q_{bot} = A * \exp(B * |groundwater\ level|)$

COFQHA = 0.1 ! Coefficient A [-100..100 cm/d, R]

COFQHB = 0.5 ! Coefficient B [-1..1 /cm, R]

\* If SWQHBOT = 1, an extra flux can be added to the exponential relation

COFQHC = 0.05 ! Water flux (positive upward) in addition to flux from exponential relation [-10..10 cm/d, R]

\* If SWQHBOT = 2, specify groundwaterlevel Htab [-1d4..0, cm, R] and bottom flux QTAB [-100..100 cm/d, R]

\* Htab is negative below the soil surface, Qtab is positive when flux is upward

HTAB QTAB ! (maximum MABBC records)

-0.1 -0.35

-70.0 -0.05

-125.0 -0.01

\* End of table

\*\*\*\*\*

\* SWBOTB = 5 Prescribe soil water pressure head of bottom compartment

\* Specify DATE [dd-mmm-yyyy] and bottom compartment pressure head HBOT5 [-1.d10..1000 cm, R]:

DATE5 HBOT5 ! (maximum MABBC records)

01-jan-2002 -95.0

30-jun-2002 -110.0

23-dec-2002 -70.0

\* End of table

\*\*\*\*\*

\*\*\* HEAT FLOW SECTION \*\*\*

\*\*\*\*\*

\* Part 1: Specify whether simulation includes heat flow

SWHEA = 1 ! Switch for simulation of heat transport [Y=1, N=0]

\*\*\*\*\*

\* Part 2: Heat flow calculation method

\* Switch for calculation method

SWCALT = 2 ! 1 = analytical method

! 2 = numerical method

\*\*\*\*\*

\* Part 3: Analytical method

\* In case of the analytical method (SWCALT = 1) specify:

TAMPLI = 10.0 ! Amplitude of annual temperature wave at soil surface  
[0..50 °C, R]

TMEAN = 15.0 ! Mean annual temperature at soil surface [-10..30 °C, R]

TIMREF = 90.0 ! Time at which the sinus temperature wave reaches it's top  
[0..366.0 d, R]

DDAMP = 50.0 ! Damping depth of soil temperature wave [1..500 cm, R]

\*\*\*\*\*

\* Part 4: Numerical method

\* In case of the numerical method (SWCALT = 2) specify:

\* Specify for each physical soil layer the soil texture (g/g mineral parts)

\* and the organic matter content (g/g dry soil):

ISOILLAY5 PSAND PSILT PCLAY ORGMAT ! (maximum MAHO records)

1 0.5400 0.2800 0.1800 0.0205

2 0.4700 0.3100 0.2200 0.0068

3 0.5600 0.1900 0.2600 0.0059

4 0.5000 0.2300 0.2800 0.0044

5 0.5500 0.2100 0.2500 0.0065

\* End of table

\* If SWINCO = 1 or 2, list initial temperature TSOIL [-50..50 °C, R] as function of

\* soil depth ZH [-1.0d5..0 cm, R]:

| ZH    | TSOIL | ! (maximum MACP records) |
|-------|-------|--------------------------|
| -10.0 | 15.0  |                          |
| -40.0 | 12.0  |                          |
| -70.0 | 10.0  |                          |
| -95.0 | 9.0   |                          |

\* End of table

\* Define top boundary condition:

SwTopbHea = 1 ! 1 = use air temperature of meteo input file as top boundary  
! 2 = use measured top soil temperature as top boundary

\* If SwTopbHea = 2, specify name of input file with soil surface temperatures

TSOILFILE = 'Haarweg' ! File name without extension .TSS, [A16]

\* Define bottom boundary condition:

SwBotbHea = 1 ! 1 = no heat flux; 2 = prescribe bottom temperature

\* If SwBotbHea = 2, specify bottom boundary temperature TBOT [-50..50 °C, R] as function of date [dd-mm-yyyy]:

| DATET       | TBOT  | ! (maximum MABBC records) |
|-------------|-------|---------------------------|
| 01-jan-2002 | -15.0 |                           |
| 30-jun-2002 | -20.0 |                           |
| 23-dec-2002 | -10.0 |                           |

\* End of table

\*\*\*\*\*

\*\*\* SOLUTE SECTION \*\*\*

\*\*\*\*\*

\* Part 1: Specify whether simulation includes solute transport

```

SWSOLU = 0      ! Switch for simulation of solute transport, [Y=1, N=0]
*****
* Part 2: Boundary and initial conditions

CPRE = 0.0     ! Solute concentration in precipitation, [0..100 mg/cm3, R]
CDRAIN = 0.1   ! Solute concentration in surface water [0..100 mg/cm3, R]

* If SWINCO = 1 or 2, list initial solute concentration CML [0..1000
mg/cm3, R]
* as function of soil depth ZC [-1d5..0 cm, R]:

      ZC      CML      ! (maximum MACP records)
    -10.0    0.0
    -95.0    0.0

* End of table
*****
* Part 3: Miscellaneous parameters as function of soil depth

* Specify for each physical soil layer:
* ISOILLAY6 = number of physical soil layer, as defined in soil water
section (part 4) [1..MAHO, I]
* LDIS      = dispersion length [0..100 cm, R]
* KF        = Freundlich adsorption coefficient [0..1d4 cm3/mg, R]
* DECPOT    = potential decomposition rate [0..10 /d, R]

ISOILLAY6    LDIS      KF    DECPOT    ! (maximum MAHO records)
    1         5.00    0.0001389    0.0
    2         5.00    0.0001378    0.0
    3         5.00    0.0001378    0.0
    4         5.00    0.0001378    0.0
    5         5.00    0.0001378    0.0
    6         5.00    0.0001378    0.0
    7         5.00    0.0001378    0.0

* --- end of Table
*****
* Part 4: Diffusion constant and solute uptake by roots

```

```

DDIF = 0.0      ! Molecular diffusion coefficient [0..10 cm2/day, R]
TSCF = 0.0      ! Relative uptake of solutes by roots [0..10 -, R]
*****
* Part 5: Adsorption

SWSP = 0        ! Switch, consider solute adsorption [Y=1, N=0]

* In case of adsorption (SWSP = 1), specify:
FREXP = 0.9     ! Freundlich exponent [0..10 -, R]
CREF  = 1.0     ! Reference solute concentration for adsorption [0..1000
mg/cm3, R]
*****
* Part 6: Decomposition

SWDC = 0        ! Switch, consider solute decomposition [Y=1, N=0]

* In case of solute decomposition (SWDC = 1), specify:
GAMPAR = 0.0   ! Factor reduction decomposition due to temperature [0..0.5
/°C, R]
RTHETA = 0.3   ! Minimum water content for potential decomposition [0..0.4
cm3/cm3, R]
BEXP   = 0.7   ! Exponent in reduction decomposition due to dryness [0..2
-, R]

* List the reduction of potential decomposition for each soil type [0..1 -,
R]:

ISOILLAY7  FDEPTH          ! (maximum MAHO records)
    1      1.00
    2      0.65

* End of table
*****
* Part 7: Solute residence time in the saturated zone

SWBR = 0        ! Switch, consider mixed reservoir of saturated zone [Y=1,
N=0]

* Without mixed reservoir (SWBR = 0), specify:

```



\* Switch for groundwater concentration in case of upward flow (seepage):

SWBOTBC = 0 ! 0 = Equal to surface water concentration CDRAIN  
! 1 = Constant concentration CSEEP  
! 2 = Concentration as function of time

\* In case of constant concentration (SWBOTBC = 1), specify:

CSEEP = 0.1 ! Solute concentration in surface water [0..100 mg/cm3, R]

\* In case of SWBOTBC = 2, specify groundwater conc. CSEEPARR [0..100 mg/cm3, R] as function of time

| DATEC       | CSEEPARR | ! (maximum MABBC records) |
|-------------|----------|---------------------------|
| 01-jan-2002 | 25.0     |                           |
| 30-jun-2002 | 40.0     |                           |
| 23-dec-2002 | 25.0     |                           |

\* End of table

\* In case of mixed reservoir (SWBR = 1), specify:

DAQUIF = 110.0 ! Thickness saturated part of aquifer [0..1d4 cm, R]  
POROS = 0.4 ! Porosity of aquifer [0..0.6 -, R]  
KFSAT = 0.2 ! Linear adsorption coefficient in aquifer [0..100 cm3/mg, R]  
DECSAT = 1.0 ! Decomposition rate in aquifer [0..10 /d, R]  
CDRAINI = 0.2 ! Initial solute concentration in groundwater [0..100 mg/cm3, R]

\*\*\*\*\*

\* End of the main input file .SWP!

## S4 Crop parametrization

```
*****
* Filename: MaizeS.CRP
* Contents: SWAP 4 - Crop data of simple model
*****

*** PLANT GROWTH SECTION ***
*****
* Part 1: Crop development

* Duration of crop growing period
  IDEV = 1 ! 1 = duration is fixed
          ! 2 = duration is variable

* If duration is fixed (IDEV = 1), specify:
  LCC = 165 ! Duration of the crop growing period [1..366 days, I]

* If duration is variable (IDEV = 2), specify:
  TSUMEA = 1101.88
  TSUMAM = 1623.99
  TBASE = 6.00
*****
* Part 2: Light extinction

  KDIF = 0.60 ! Extinction coefficient for diffuse visible light
[0..2 -, R]
  KDIR = 0.75 ! Extinction coefficient for direct visible light
[0..2 -, R]
*****
* Part 3: Leaf area index or soil cover fraction

  SWGC = 1 ! choice between leaf area index [=1] or soil cover fraction
[=2]

* If SWGC = 1, list leaf area index LAI [0..12 (m2 leaf)/(m2 soil), R],
as function of dev. stage [0..2 -, R]:

* If SWGC = 2, list soil cover fraction SCF [0..1 (m2 cover)/(m2 soil), R],
as function of dev. stage [0..2 -, R]:
```

\* DVS LAI or SCF ! ( maximum MAGRS records)

GCTB =

|      |      |
|------|------|
| 0.00 | 0.05 |
| 0.30 | 0.14 |
| 0.50 | 0.61 |
| 0.70 | 4.10 |
| 1.00 | 5.00 |
| 1.40 | 5.80 |
| 2.00 | 5.20 |

\* End of table

\*\*\*\*\*

\* Part 4: Crop factor or crop height

\* Choose between crop factor and crop height

\* Choose crop factor if ETref is used, either from meteo input file (SWETR = 1) or with Penman-Monteith

\* Choose crop height if Penman-Monteith should be used with actual crop height, albedo and canopy resistance

SWCF = 2 ! 1 = crop factor

! 2 = crop height

\* If SWCF = 1, list crop factor CF [0..2 -, R], as function of dev. stage DVS [0..2 -, R]:

\* If SWCF = 2, list crop height CH [0..1.d4 cm, R], as function of dev. stage DVS [0..2 -, R]:

| DVS | CH    | CF  | ! ( maximum MAGRS records) |
|-----|-------|-----|----------------------------|
| 0.0 | 1.0   | 0.8 |                            |
| 0.3 | 15.0  | 0.8 |                            |
| 0.5 | 40.0  | 0.9 |                            |
| 0.7 | 140.0 | 1.0 |                            |
| 1.0 | 170.0 | 1.1 |                            |
| 1.4 | 180.0 | 1.2 |                            |
| 2.0 | 175.0 | 1.2 |                            |

\* End of table

\* If SWCF = 2, in addition to crop height list crop specific values for:

```

ALBEDO = 0.23 ! crop reflection coefficient [0..1.0 -, R]
RSC     = 61.0 ! Minimum canopy resistance [0..1d6 s/m, R]
RSW     = 0.0 ! Canopy resistance of intercepted water [0..1d6 s/m, R]
*****
* Part 5: rooting depth

* List rooting depth RD [0..1000 cm, R], as a function of development stage
DVS [0..2 -, R]:

*      DVS  RD      ! (maximum MAGRS records)
RDTB =
      0.00  5.00
      0.30 20.00
      0.50 50.00
      0.70 80.00
      1.00 90.00
      2.00 100.00

* End of table
*****

* Part 6: yield response

* List yield response factor KY [0..5 -, R], as function of development
stage DVS [0..2 -, R]:

*      DVS  KY      (maximum MAGRS records)
KYTB =
      0.00  1.00
      2.00  1.00

* End of table
*****

* Part 7: Soil water extraction by plant roots

* -- Part 7a: Oxygen stress -----
* Switch for oxygen stress:
SwOxygen = 1      ! 0 = No oxygen stress
              ! 1 = Oxygen stress according to Feddes et al. (1978)

```

(2008) ! 2 = Oxygen stress according to Bartholomeus et al.

\* If SwOxygen = 1, specify:

HLIM1 = -15.0 ! No water extraction at higher pressure heads [-100..100 cm, R]

HLIM2U = -30.0 ! h below which optimum water extr. starts for top layer [-1000..100 cm, R]

HLIM2L = -30.0 ! h below which optimum water extr. starts for sub layer [-1000..100 cm, R]

\* If SwOxygen = 2, specify:

SwOxygenType = 1 ! Switch for physical processes or reproduction functions to calculate oxygen stress:

! 1 = Use physical processes

! 2 = Use reproduction functions

\* If SwOxygenType = 1, specify:

Q10\_microbial = 2.8d0 ! Relative increase in microbial respiration at temperature rise of 10 °C [1.0..4.0 -, R]

Specific\_resp\_humus = 1.6d-3 ! Respiration rate of humus at 25 °C [0.0..1.0 kg O2/kg °C/d, R]

SRL = 151375.d0 ! Specific root length [0.d0..1d10 (m root)/(kg root), R]

SwRootRadius = 2 ! Switch for calculation of root radius:

! 1 = Calculate root radius

! 2 = Root radius is given in input

file

\* If SwRootRadius = 1, specify:

Dry\_mat\_cont\_roots = 0.075d0 ! Dry matter content of roots [0..1 -, R]

Air\_filled\_root\_por = 0.05d0 ! Air filled root porosity [0..1 -, R]

Spec\_weight\_root\_tissue = 1.0d3 ! Specific weight of non-airfilled root tissue [0..1d5 (kg root)/(m3 root), R]

Var\_a = 4.175d-10 ! Variance of root radius [0..1 -, R]

\* If SwRootRadius = 2, specify:

Root\_radiusO2 = 0.00015d0 ! Root radius (mind: in meter!) for  
oxygen stress module [1d-6..0.1 m, R]

\* If SwOxygenType = 2, specify:

SwTopSub = 2 ! Switch for topsoil or subsoil: 1 = topsoil, 2 =  
subsoil

NrStaring = 3 ! Number of soil type according to Staring series  
(Wosten et al., 2001), [1..18, I]

\* -- Part 7b: Drought stress -----

\* Switch for drought stress:

SwDrought = 1 ! 1 = Drought stress according to Feddes et al. (1978)  
! 2 = Drought stress according to De Jong van Lier et  
al. (2008)

\* If SwDrought = 1, or in case of irrigation scheduling (SCHEDULE = 1),  
specify:

HLIM3H = -325.0 ! Pressure head below which water uptake reduction  
starts at high Tpot [-1d4..100 cm, R]

HLIM3L = -600.0 ! Pressure head below which water uptake reduction  
starts at low Tpot [-1d4..100 cm, R]

HLIM4 = -8000.0 ! No water extraction at lower soil water pressure  
heads [-2d4..100 cm, R]

ADCRH = 0.5 ! Level of high atmospheric demand, corresponding  
to HLIM3H [0..5 cm/d, R]

ADCRL = 0.1 ! Level of low atmospheric demand, corresponding to  
HLIM3L [0..5 cm/d, R]

ALPHACRIT = 1.0 ! Critical stress index (Jarvis, 1989) for  
compensation of root water uptake [0.2..1 -, R]

\* If SwDrought = 2, specify:

WILTPOINT = -20000.0 ! Minimum pressure head in leaves [-1d8..-1d2 cm,  
R]

KSTEM = 1.03d-4 ! Hydraulic conductance between leaf and root xylem  
[1d-10..10 /d, R]

RXYLEM = 0.02 ! Xylem radius [1d-4..1 cm, R]

ROOTRADIUS = 0.05 ! Root radius [1d-4..1 cm, R]

KROOT = 3.5d-5 ! Radial hydraulic conductivity of root tissue [1d-  
10..1d10 cm/d, R]

ROOTCOEFA = 0.53 ! Defines relative distance between roots at which  
mean soil water content occurs [0..1 -, R]

```

    SWHYDLIFT =          0 ! Switch for possibility hydraulic lift in root
system [N=0, Y=1]

    ROOTEFF      =          1.0 ! Root system efficiency factor [0..1 -, R]

    STEPHR      =          1.0 ! Step between values of hroot and hxylem in
iteration cycle [0..10 cm, R]

    CRITERHR    =          0.001 ! Maximum difference of Hroot between iterations;
convergence criterium [0...10 cm, R]

    TACCUR      =          0.001 ! Maximum absolute difference between simulated and
calculated potential transpiration rate (1d-5..1d-2 cm/d, R)
*****

* Part 8: salt stress

* Switch salinity stress

    SWSALINITY = 0 ! 0 = No salinity stress
                  ! 1 = Maas and Hoffman reduction function
                  ! 2 = Use osmotic head

* If SWSALINITY = 1, specify threshold and slope of Maas and Hoffman

    SALTMAX     = 3.0 ! Threshold salt concentration in soil water [0..100
mg/cm3, R]

    SALTSLOPE  = 0.1 ! Decline of root water uptake above threshold [0..1.0
cm3/mg, R]

* If SWSALINITY = 2, specify:

    SALTHEAD   = 624.0 ! Conversion salt concentration (mg/cm3) into osmotic
head (cm) [0..1000.0 cm/(mg/cm3), R]
*****

* Part 9: interception

* Switch for rainfall interception method:

    SWINTER    = 1 ! 0 = No interception
                  ! 1 = Agricultural crops (Von Hoyningen-Hune and Braden)
                  ! 2 = Closed forest canopies (Gash)

* In case of interception method for agricultural crops (SWINTER = 1),
specify:

    COFAB     = 0.25 ! Interception coefficient Von Hoyningen-Hune and Braden
[0..1 cm, R]

```

\* In case of interception method for closed forest canopies (SWINTER = 2), specify as function of time T [0..366 d, R]:

\* PFREE = Free throughfall coefficient [0..1 -, R]

\* PSTEM = Stem flow coefficient [0..1 -, R]

\* SCANOPY = Storage capacity of canopy [0..10 cm, R]

\* AVPREC = Average rainfall intensity [0..100 cm/d, R]

\* AVEVAP = Average evaporation intensity during rainfall from a wet canopy [0..10 cm/d, R]

| T                       | PFREE | PSTEM | SCANOPY | AVPREC | AVEVAP | ! |
|-------------------------|-------|-------|---------|--------|--------|---|
| (maximum MAGRS records) |       |       |         |        |        |   |
| 0.0                     | 0.9   | 0.05  | 0.4     | 6.0    | 1.5    |   |
| 365.0                   | 0.9   | 0.05  | 0.4     | 6.0    | 1.5    |   |

\* End of table

\*\*\*\*\*

\* Part 10: Root density distribution and root growth

\* List root density [0..100 cm/cm<sup>3</sup>, R] as function of relative rooting depth [0..1 -, R]:

\* In case of drought stress according to Feddes et al. (1978) (SWDROUGHT = 1), relative root density (-) is sufficient

\* Rdepth Rdensity ! (maximum 11 records)

RDCTB =

0.0,1.000

0.1,0.741

0.2,0.549

0.3,0.407

0.4,0.301

0.5,0.223

0.6,0.165

0.7,0.122

0.8,0.091

0.9,0.067

1.0,0.050

\* End of table



\*\*\*\*\*

\*\*\* IRRIGATION SCHEDULING SECTION \*\*\*

\*\*\*\*\*

\* Part 1: General

SCHEDULE = 0 ! Switch for application irrigation scheduling [Y=1, N=0]

\* If SCHEDULE = 0, no more information is required in this input file!

\* If SCHEDULE = 1, continue ....

STARTIRR = 30 3 ! Specify day and month at which irrigation scheduling starts [dd mm]

ENDIRR = 31 12 ! Specify day and month at which irrigation scheduling stops [dd mm]

CIRRS = 0.0 ! Solute concentration of irrigation water [0..100 mg/cm3, R]

ISUAS = 1 ! Switch for type of irrigation method:

! 0 = sprinkling irrigation

! 1 = surface irrigation

\* Specify pressure head at field capacity which will be used for irrigation timing options

phFieldCapacity = -100.0 ! Soil water pressure head at field capacity [-1000..0 cm, R]

\*\*\*\*\*

\* Part 2: Irrigation time criteria

\*\*\* Choose one of the following 5 timing options:

TCS = 1 ! Switch for timing criterion [1..6 -, I]

! 1 = Ratio actual/potential transpiration

! 2 = Depletion of Readily Available Water

! 3 = Depletion of Totally Available Water

! 4 = Depletion of absolute Water Amount

! 5 = Pressure head or moisture content

! 6 = Fixed weekly irrigation, bring root zone back to field capacity

```

* Ratio actual/potential transpiration (TCS = 1)
* If TCS = 1, specify minimum of ratio actual/potential transpiration Trel
[0..1 -, R] as function of crop development stage
  DVS_tc1  Trel  ! (maximum 7 records)
           0.0  0.95
           2.0  0.95
* End of table

* Depletion of Readily Available Water (TCS = 2)
* If TCS = 2, specify minimum fraction of readily available water RAW [0..1
-, R] as function of crop development stage
  DVS_tc2  RAW   ! (maximum 7 records)
           0.0  0.95
           2.0  0.95
* End of table

* Depletion of Totally Available Water (TCS = 3)
* If TCS = 3, specify minimal fraction of totally available water TAW [0..1
-, R] as function of crop development stage
  DVS_tc3  TAW   ! (maximum 7 records)
           0.0  0.50
           2.0  0.50
* End of table

* Depletion of absolute Water Amount (TCS = 4)
* If TCS = 4, specify maximum amount of water depleted below field capacity
DWA [0..500 mm, R] as function of crop development stage
  DVS_tc4  DWA   ! (maximum 7 records)
           0.0  40.0
           2.0  40.0
* End of table

* Pressure head or Moisture content (TCS = 5), specify
  PHORMC = 0    ! Switch, use either pressure head (PHORMC = 0) or water
content (PHORMC = 1)
  DCRIT = -30.0 ! Depth of the sensor [-100..0 cm, R]
* Also specify critical pressure head [-1d6..-100 cm, R] or moisture
content [0..1 cm3/cm3, R] as function of crop development stage

```

```
DVS_tc5  Value_tc5
      0.0   -1000.0
      2.0   -1000.0
```

\* End of table

\* In case TCS = 5, over-irrigation can be applied if the salinity concentration exceeds a threshold salinity

\* Switch for over-irrigation:

```
SWCIRRTHRES = 0    ! 0 = No over-irrigation
                ! 1 = Apply over-irrigation
```

\* If SWCIRRTHRES = 1, specify:

```
CIRRTHRES = 8.0    ! Threshold salinity concentration above which over-
irrigation occurs [0..100 mg/cm3, R]
```

```
PERIRRSURP = 10.0 ! Over-irrigation as percentage of the usually
scheduled irrigation depth [0..100 %, R]
```

\* Fixed weekly irrigation, root zone back to field capacity (TCS = 6), specify

\* Threshold value for weekly irrigation; only irrigate when soil water deficit in root zone is larger than threshold

```
IRGTHRESHOLD = 1.0    ! threshold value [0..20 mm, R]
```

\* Switch for minimum time interval between irrigation applications

```
TCSFIX = 0          ! 0 = no minimum time interval
                ! 1 = define minimum time interval
```

\* If TCSFIX = 1, specify:

```
IRGDAYFIX = 7       ! Minimum number of days between irrigation applications
[1..366 d, I]
```

\*\*\*\*\*

\* Part 3: Irrigation depth criteria

\* Choose one of the following two options for irrigation depth:

```
DCS = 1            ! 1 = Back to Field Capacity
                ! 2 = Fixed Irrigation Depth
```

\* Back to Field Capacity (DCS = 1)

```

* If DCS = 1, specify amount of under (-) or over (+) irrigation dI [-
100..100 mm, R],
* as function of crop development stage [0..2, R]
    DVS_dc1    dI        ! (maximum 7 records)
        0.0  10.0
        2.0  10.0
* End of table

    RAITHRESHOLD = 10.0 ! When rainfall exceeds RAITHRESHOLD, irrigation is
reduced with rainfall [0..1000 cm, R]

* Fixed Irrigation Depth (DCS = 2)
* If DCS = 2, specify fixed irrigation depth FID [0..400 mm, R],
* as function of crop development stage [0..2, R]
    DVS_dc2    FID        ! (maximum 7 records)
        0.0  60.0
        2.0  60.0
* End of table

* Select minimum and maximum of irrigation depths:
dcslim = 0          ! Switch, limit range irrigation depth [Y=1, N=0]

* If dcslim = 1, specify:
irgdepmin = 10.0   ! Minimum irrigation depth [0..100 mm, I]
irgdepmax = 80.0   ! Maximum irrigation depth [irgdepmin..1d7 mm, I]

* End of .crp file !

```

## S5. Effect of Representative Concentration Pathways (RCP)

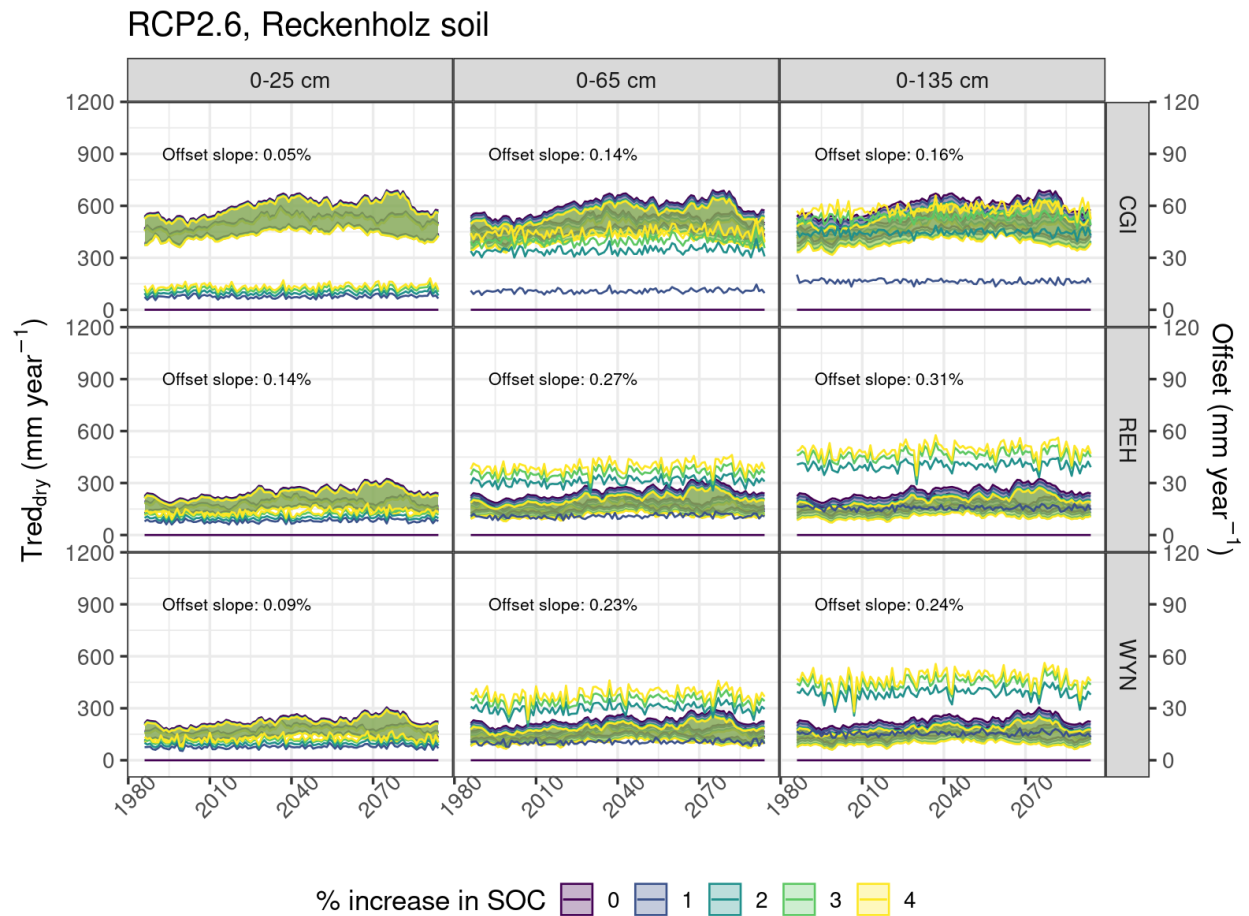

Figure S 2 - Transpiration reduction due to drought stress ( $Tred_{dry}$ ) (left axis) for actual and future climate conditions considering different levels of SOC increase in the soil at different effective soil depths. Climate projections considering RCP2.6 and averaged for every 10 years. Shaded area refers to the values between quantiles  $q_{0.05}$  and  $q_{0.95}$  of the climate projections. The slope refers to the offset (right axis; interpretable as average seasonal gain in transpiration with SOC increase) between 0 and 4% addition of SOC. *Offset slope* refers to the slope of the offset line between 0 and 4% SOC addition.

### RCP4.5, Reckenholz soil

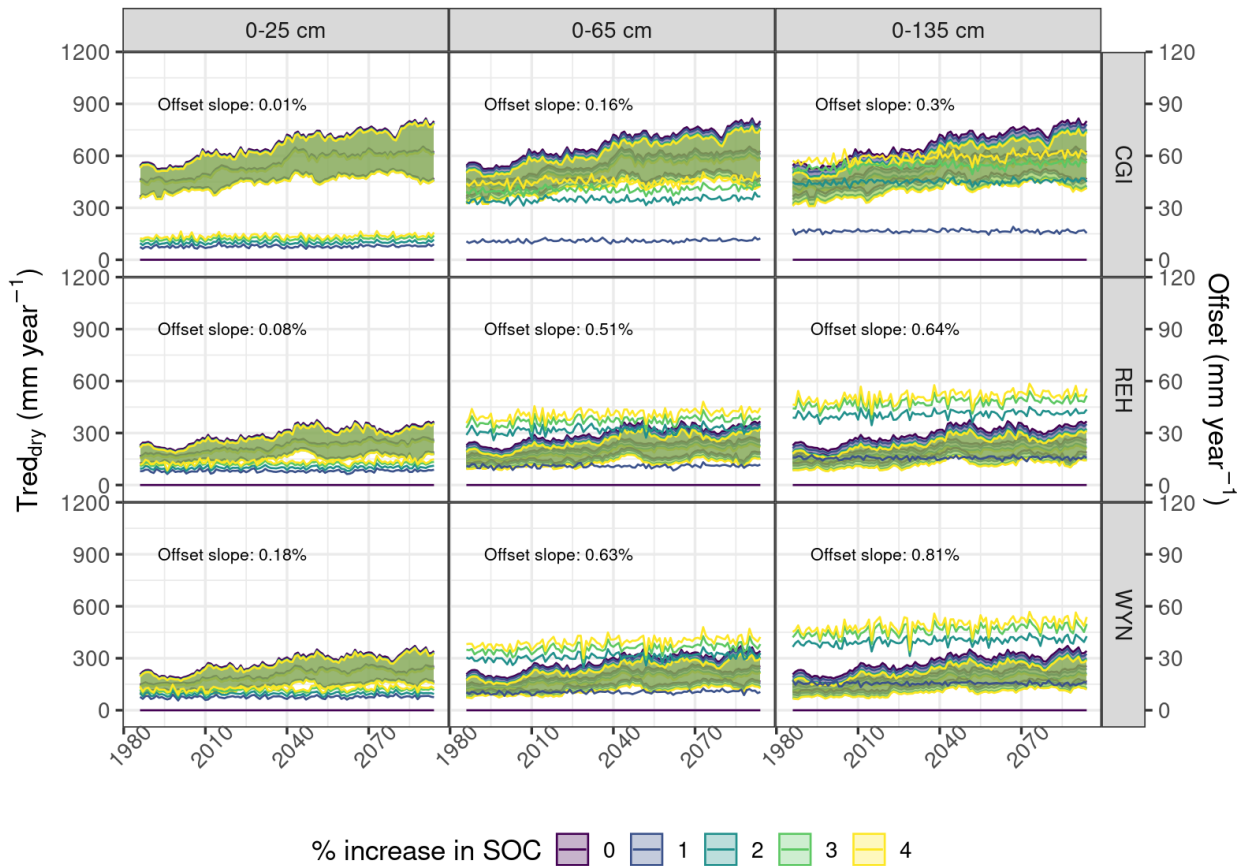

Figure S 3 - Transpiration reduction due to drought stress ( $Tred_{dry}$ ) (left axis) for actual and future climate conditions considering different levels of SOC increase in the soil at different effective soil depths. Climate projections considering RCP4.5 and averaged for every 10 years. Shaded area refers to the values between quantiles  $q_{0.05}$  and  $q_{0.95}$  of the climate projections. The slope refers to the offset (right axis; interpretable as average seasonal gain in transpiration with SOC increase) between 0 and 4% addition of SOC. *Offset slope* refers to the slope of the offset line between 0 and 4% SOC addition.

**S6. Detailed profile soil water content at CGI and WYN**

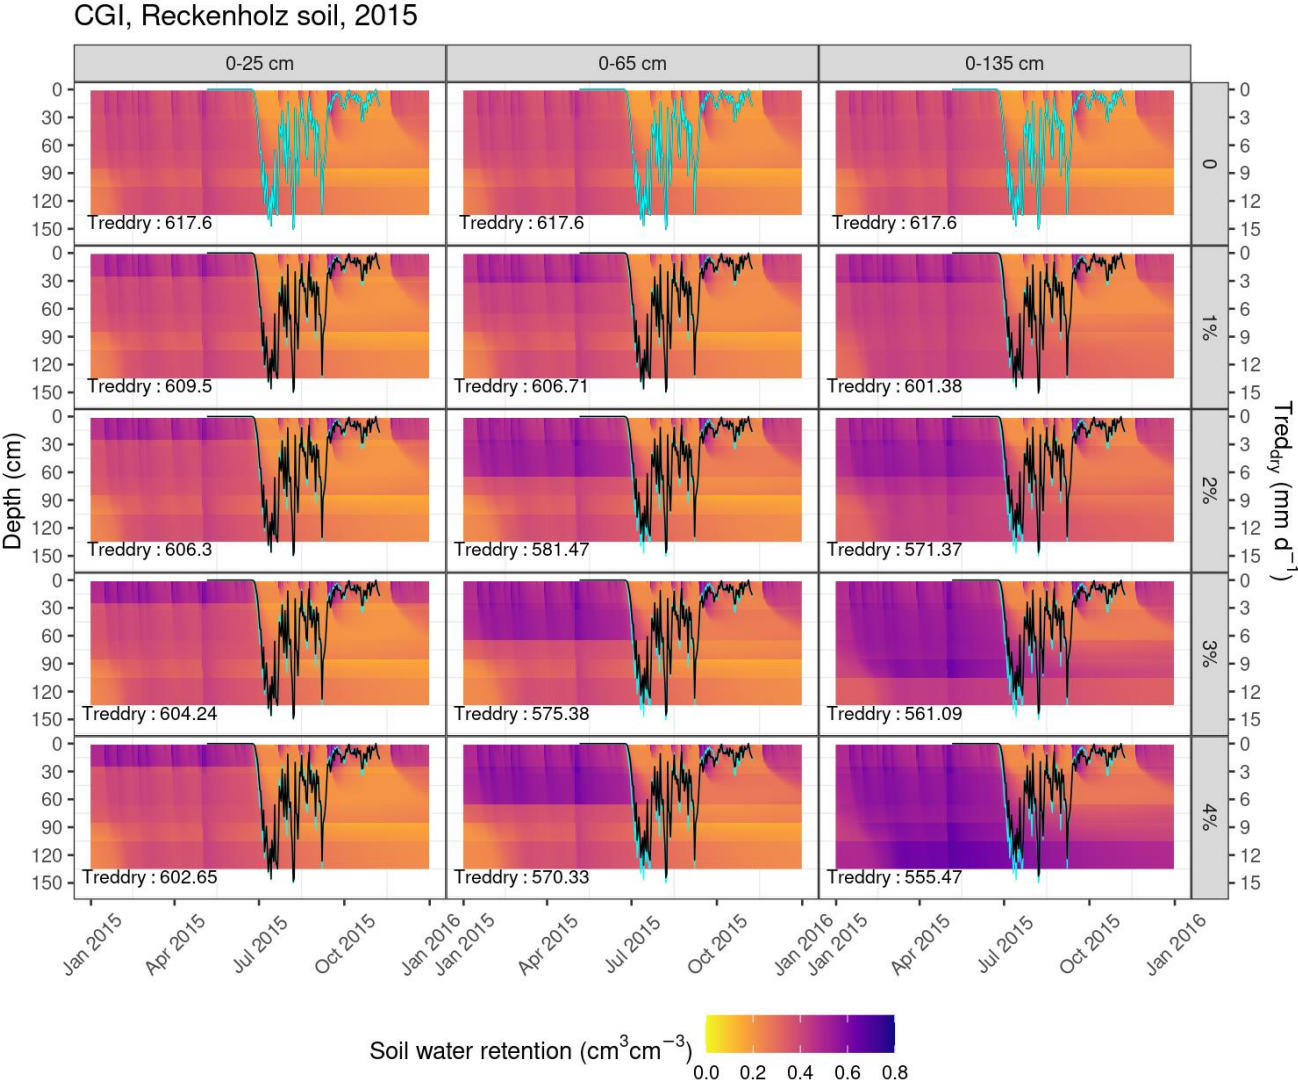

Figure S 4 - Detailed profile of soil water content (left axis) and Tred<sub>dry</sub> (right axis, black lines) according to the different added SOC levels at the Changins site (CGI) in the year of 2015. The blue line represents Tred<sub>dry</sub> for the original soil profile (0% SOC). When cumulated for the year, their difference yields the annual offset in crop transpiration deficit that is due to the addition of carbon to the soil.

WYN, Reckenholz soil, 2015

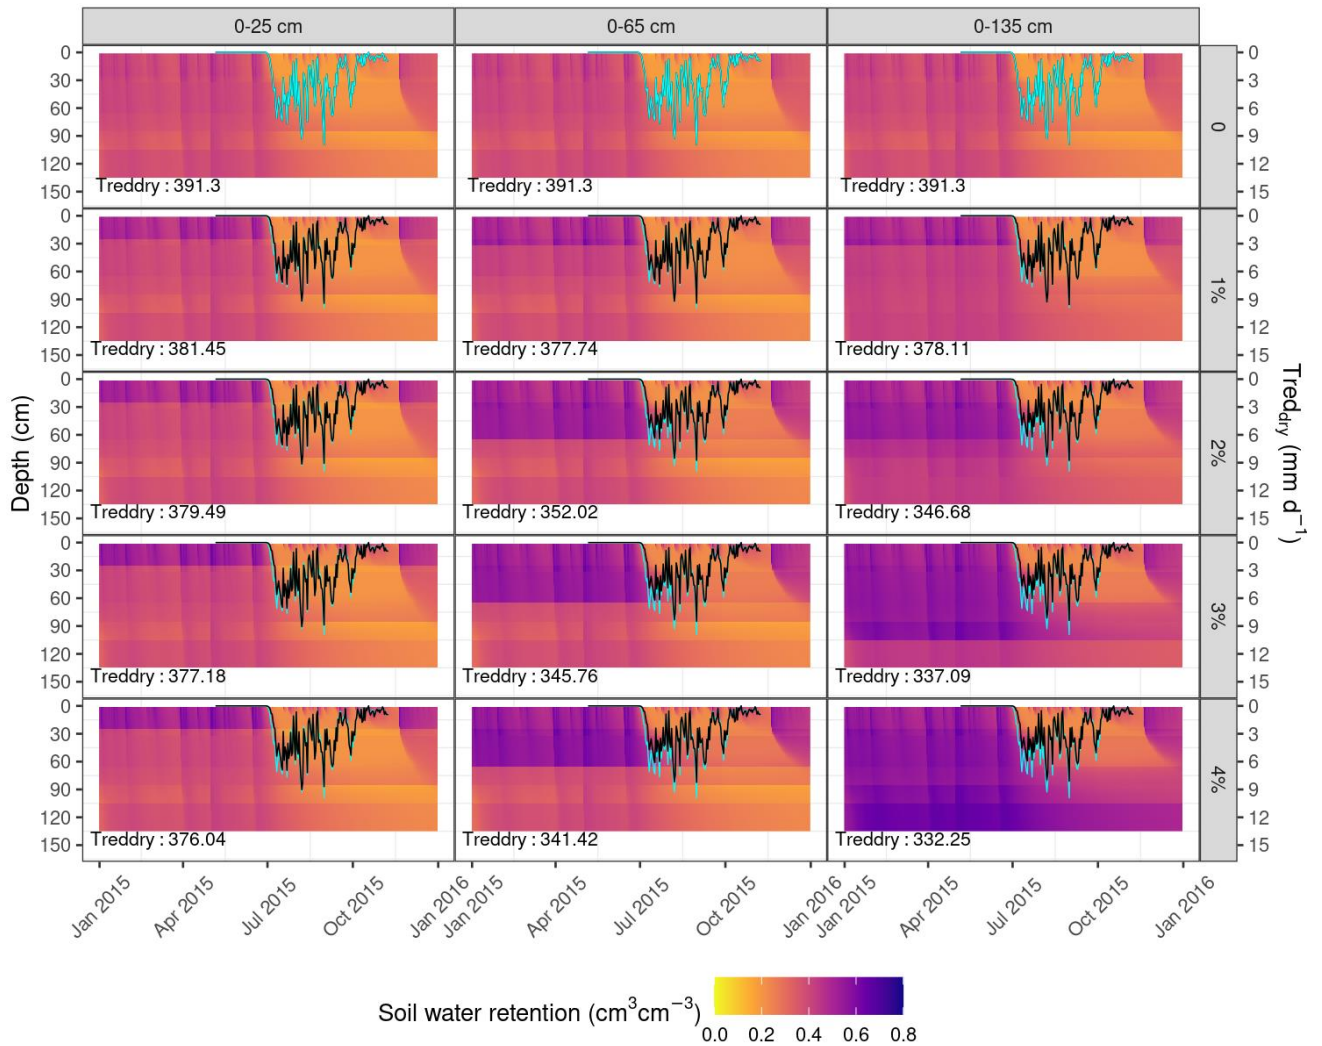

Figure S 5 - Detailed profile of soil water content (left axis) and  $Tred_{dry}$  (right axis, black lines) according to the different added SOC levels at the Wynau site (WYN) in the year of 2015. The blue line represents  $Tred_{dry}$  for the original soil profile (0% SOC). When cumulated for the year, their difference yields the annual offset in crop transpiration deficit that is due to the addition of carbon to the soil.
